# Supplementary material
Source: PubMed Central journal article supplement (PMC4490118)

## **Supplemental Table**

| <b>Table S1: List of antibodies used for immunophenotypic analysis.</b> |              |                             |                 |
|-------------------------------------------------------------------------|--------------|-----------------------------|-----------------|
| <b>Antigen</b>                                                          | <b>Clone</b> | <b>Isotype</b>              | <b>Supplier</b> |
| CD90                                                                    | 5.00E+10     | APC- conjugated mouse IgG1  | BD Biosciences  |
| CD73                                                                    | AD2          | PE- conjugated mouse IgG1   | BD Biosciences  |
| CD 105                                                                  | SN6          | FITC- conjugated mouse IgG1 | AbD Serotec     |
| CD45                                                                    | HI30         | APC- conjugated mouse IgG1  | BD Biosciences  |
| CD34                                                                    | 581          | PE- conjugated mouse IgG1   | BD Biosciences  |
| CD31                                                                    | WM59         | FITC- conjugated mouse IgG1 | BD Biosciences  |

## Supplemental Information

**Table S2. List of primers used for cell characterization.**

| <i>Gene</i>   | <i>Fw 5'-3'</i>          | <i>Rv 5'-3'</i>           |
|---------------|--------------------------|---------------------------|
| <i>OCT-4</i>  | AAGAACATGTGTAAGCTGCGGCC  | GGAAAGGCTCCCCCTCAGGGAAAGG |
| <i>NANOG</i>  | GATTTGTGGGCCTGAAGAAA     | TGGGGTAGGTAGGTGCTGAG      |
| <i>DNMT3B</i> | TTTGGCCACCTTCAATAAGC     | GGCAACATCTGAAGCCATTT      |
| <i>GDF3</i>   | CTTACCCCAGAAGTTCCAA      | GCAGGTTGAAGTGAACAGCA      |
| <i>GABR3</i>  | CTTGACAATCGAGTGGCTGA     | CAACCGAAAGCTCAGTGACA      |
| <i>NFH</i>    | TGAACACAGACGCTATGCGCTCAG | CACCTTTATGTGAGTGGACACAGAG |
| <i>ABCG2</i>  | GGCCTCAGGAAGACTTATGT     | AAGGAGGTGGTGTAGCTGAT      |
| <i>ESR1</i>   | ACAAGCGCCAGAGAGATGAT     | GCCTTAATTCTCCTCCTCC       |
| <i>PGR</i>    | GACTGAGCTGAAGGCAAAGG     | TCCAAGACACTGTCCAGCAG      |
| <i>GAPDH</i>  | TCACCATCTTCCAGGAGCG      | CTGCTTCACCACCTTCTTGA      |

## Supplemental Figure S1.

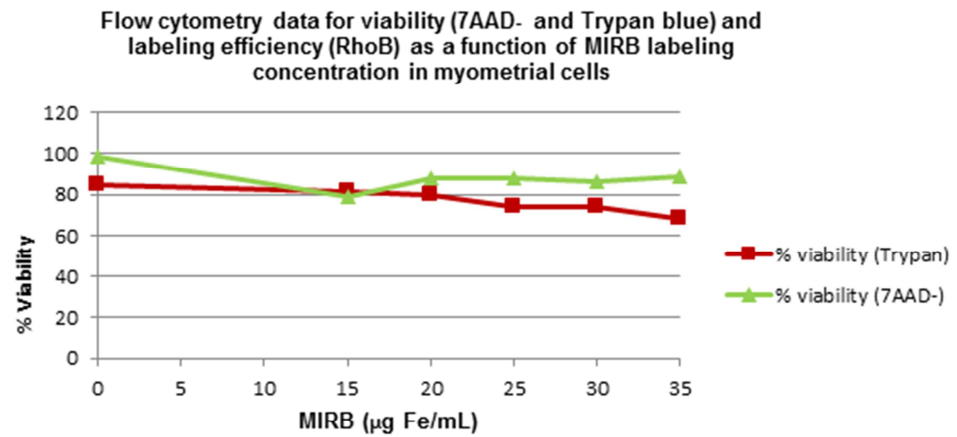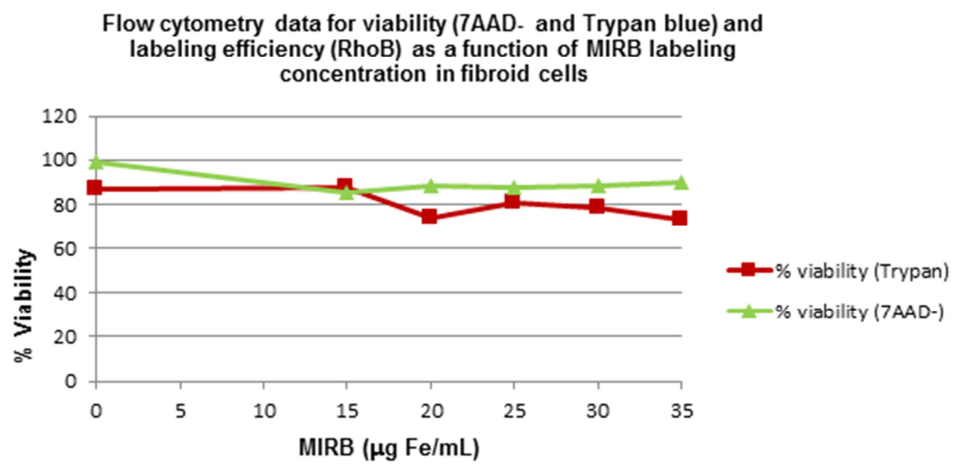

Supplement: NIHMS692175-supplement-01.pdf [file NIHMS692175-supplement-01.pdf]
